# Supplementary material for: Rethink Organization to iMprove Education and Outcomes (ROMEO)
Source: Oxford University Press journal article supplement (doi:10.2337/dc09-2024), 2010-01-26

## ONLINE APPENDIX

### List of Rethink Organization to Improve Education and Outcomes investigators:

E. Ansaldi, F. Malvicino, M. Battezzati, P. Maresca, C. Cappa, C. Palenzona, G. Rosti, *Alessandria*  
L. Gentile, G. De Corrado, M. Fernicola, R. Gambaudo, E. Molina, T. Miroglio, S. Poggio, E. Repetti, F. Rosso, P. Viglione, *Asti*  
G. Morone, F. Travaglino, *Biella*  
A. Chiambretti, M. Albertone, A. Birocco, MP Maritano, E. Mularoni, R. Fornengo, D. Rolfo, *Chivasso*  
S. Gamba, *Ospedale Maria Vittoria, Torino*  
A. Mormile, P. De Murtas, AM. Ingaramo, A. Marchesini, *Ospedale Mauriziano, Torino*  
E. Orsi, F. Albani, L. Giarratana, *Milano*  
G. Corigliano, I. Vaccarella, *Napoli*  
M. Patella, M. Masin, G. Sartore, R. Toniatto, R. Valentini, A. Barison, D. Fedele, *Padova*  
V. Miselli, P. Accorsi, U. Pagliani, *Scandiano-Reggio Emilia*  
L. Tonutti, C. Boscariol, M. Armellini, R. Lesa, C. Sartori, C. Noacco, C. Taboga, *Udine*  
L. Richiardi, S. Borla, *Ospedale Valdese, Torino*

**Online Appendix Table 1. Baseline characteristics of the patients enrolled.**

|                                                          | <b>Group Care</b>    | <b>Controls</b>     | <b>Significance</b> |
|----------------------------------------------------------|----------------------|---------------------|---------------------|
| n                                                        | 421                  | 394                 |                     |
| Gender (M/F)                                             | 202/219              | 211/183             | n.s.                |
| Age                                                      | 69.0 ± 8.4           | 69.6 ± 8.4          | n.s.                |
| Known duration of diabetes                               | 15.7 ± 6.9           | 16.6 ± 7.2          | n.s.                |
| <sup>a</sup> Schooling (N/P/M/H/U)                       | 28/221/101/65/6      | 13/220/99/59/3      | n.s.                |
| <sup>b</sup> Occupation (U/H/R/B/W/C/T)                  | 4/123/207/24/27/27/9 | 1/85/206/48/30/21/3 | p<0.01              |
| Attendance in clinic before study (years)                | 5.8 ± 4.9            | 6.0 ± 4.6           | n.s.                |
| <sup>c</sup> Family history of diabetes (Yes/No/Unknown) | 220/193/8            | 232/158/4           | n.s.                |
| Owns glucose meter (Yes/No)                              | 152/269              | 162/232             | n.s.                |
| Self-monitoring blood glucose (Yes/No)                   | 138/283              | 148/246             | n.s.                |
| Smoking (Current/Never/Stopped)                          | 79/247/95            | 67/222/105          | n.s.                |

<sup>a</sup>N = No formal education, P = Primary school, M = Middle school, H = High school, U = University degree

<sup>b</sup>U = Unemployed, H = Housewife, R = Retired, B = Blue collar worker, W = White collar worker, C = Craftsman, T = Teacher

<sup>c</sup>First degree relative.

**Online Appendix Table 2. Biochemical and clinical variables, health behaviours, quality of life, and knowledge of diabetes at baseline and year 4.**

|                                         | Group Care         |                   |                                             | Controls           |                   |                                             | Difference (95% CI) at year 4 between Group Care and Controls* |
|-----------------------------------------|--------------------|-------------------|---------------------------------------------|--------------------|-------------------|---------------------------------------------|----------------------------------------------------------------|
|                                         | Baseline (Mean±SD) | 4 years (Mean±SD) | Mean Difference between baseline and year 4 | Baseline (Mean±SD) | 4 years (Mean±SD) | Mean Difference between baseline and year 4 |                                                                |
| Body weight (kg)                        | 81.44 ± 14.87      | 80.4 ± 14.6       | -1.57±0.3<br><b>p&lt;0,001</b>              | 78.22 ± 15.02      | 82.1±15.4         | +1.96±0.44<br><b>p&lt;0,001</b>             | <b>-3.50 (-4.22/-2.08)</b><br><b>p&lt;0,001</b>                |
| Body Mass Index (kg/m <sup>2</sup> )    | 30.62 ± 4.99       | 30.1 ± 5.0        | -0.59±0.11<br><b>p&lt;0,001</b>             | 29.34 ± 5.11       | 30.4±5.8          | +0.65±0.2<br><b>p&lt;0,01</b>               | <b>-1.09 (-1.56/-0.62)</b><br><b>p&lt;0,001</b>                |
| Fasting blood glucose (mmol/l)          | 9.33 ± 2.64        | 8.78 ± 2.27       | -0.71±0,16<br><b>p&lt;0,001</b>             | 9.35 ± 2.69        | 9.44±2.89         | +0.31±0.20<br>n.s.                          | <b>-1.06 (-1.51/-0.62)</b><br><b>p&lt;0,001</b>                |
| HbA <sub>1c</sub> (percent of total Hb) | 7.75 ± 1.57        | 7.30 ± 0.9        | -0.53±0.07<br><b>p&lt;0,001</b>             | 7.81 ± 1.43        | 8.80±1.2          | +0.93±0.06<br><b>p&lt;0,001</b>             | <b>-1.49 (-1.63/-1.34)</b><br><b>p&lt;0,001</b>                |
| Total cholesterol (mmol/l)              | 5,44 ± 1.04        | 4.88 ± 0.96       | -0.67±0,07<br><b>p&lt;0,001</b>             | 5.43 ± 1.08        | 5.47 ± 0,94       | +0.05±0.07<br>n.s.                          | <b>-0.66 (-0.82/-0.50)</b><br><b>p&lt;0,001</b>                |
| HDL cholesterol (mmol/l)                | 1.27 ± 0.34        | 1.42 ± 0,29       | +0.13±0.01<br><b>p&lt;0,001</b>             | 1.30 ± 0.35        | 1.29 ± 0,33       | -0.01±0.02<br>n.s.                          | <b>+0.13 (+0.09/+0.18)</b><br><b>p&lt;0,001</b>                |
| LDL cholesterol,                        | 3.37± 0.90         | 2.79 ± 0.94       | -0.64±0.06<br><b>p&lt;0,001</b>             | 3.31±0.95          | 3.31 ± 0,97       | -0.01±0.07<br>n.s.                          | <b>-0.63 (-0.79/-0.47)</b><br><b>p&lt;0,001</b>                |
| Triglyceride (mmol/l)                   | 1.84 ± 1.21        | 1,46 ± 0,59       | -0.37±0.06<br><b>p&lt;0,001</b>             | 1.84 ± 1.08        | 1,94 ± 1.17       | +0.12±0.04<br><b>p&lt;0,01</b>              | <b>-0.51 (-0.63/-0.38)</b><br><b>p&lt;0,001</b>                |
| Systolic blood pressure (mmHg)          | 143.83 ± 16.93     | 138.01 ± 16.1     | -6.56±1.2<br><b>p&lt;0,001</b>              | 143.86 ± 16.47     | 143.6±18.5        | -0.16±1.3<br>n.s.                           | <b>-4.42 (-7.35/-1.48)</b><br><b>p=0,003</b>                   |
| Diastolic blood pressure (mmHg)         | 83.40 ± 9.27       | 79.1 ± 9.4        | -4.6±0.6<br><b>p&lt;0,001</b>               | 82.12 ± 9.31       | 80.6±8.4          | -1.9±0.7<br><b>p&lt;0,01</b>                | <b>-3.29 (-5.24/-1.33)</b><br><b>p&lt;0,001</b>                |
| Creatinine (mmol/l)                     | 76.0 ± 19.4        | 76,0 ± 23.0       | +0.9±0.9<br>n.s.                            | 76,9±19.4          | 85.7 ± 26.5       | +8.84±1.41<br><b>p&lt;0,001</b>             | <b>-8.84(-12.38/-5.30)</b><br><b>p&lt;0,001</b>                |
| Health behaviors (CdR score)            | 10.99 ± 3.17       | 15.24 ± 2.62      | +4.11 ± 0.16<br><b>p&lt;0,001</b>           | 11.08 ± 3.28       | 11.07 ± 3.00      | -0.15 ± 0.15<br>n.s.                        | <b>+4.16 (3.77/4.55)</b><br><b>p&lt;0,001</b>                  |
| Quality of life (DQOL/ Mod score)       | 71.86 ± 13.20      | 63.22 ± 10.27     | - 9.08 ± 0.55<br><b>p&lt;0,001</b>          | 71.01 ± 14.53      | 77.88 ± 13.14     | +9.14 ± 0.54<br><b>p&lt;0,001</b>           | <b>-16.77 (-18.29/15.25)</b><br><b>p&lt;0,001</b>              |
| Knowledge of diabetes (GISED score)     | 38.49 ± 15.54      | 48.37 ± 13.42     | +8.46 ± 0.67<br><b>p&lt;0,001</b>           | 38.42 ± 16.08      | 38.69 ± 14.07     | -2.11 ± 0.63<br><b>p&lt;0,01</b>            | <b>+10.60 (8.91/12.28)</b><br><b>p&lt;0,001</b>                |

The difference is adjusted for participating centre, gender, family history for diabetes, schooling, occupation, years of attendance in clinic and baseline values of the dependent variable.

**Online Appendix Fig. 1. CONSORT diagram of ROMEO patients flow.**

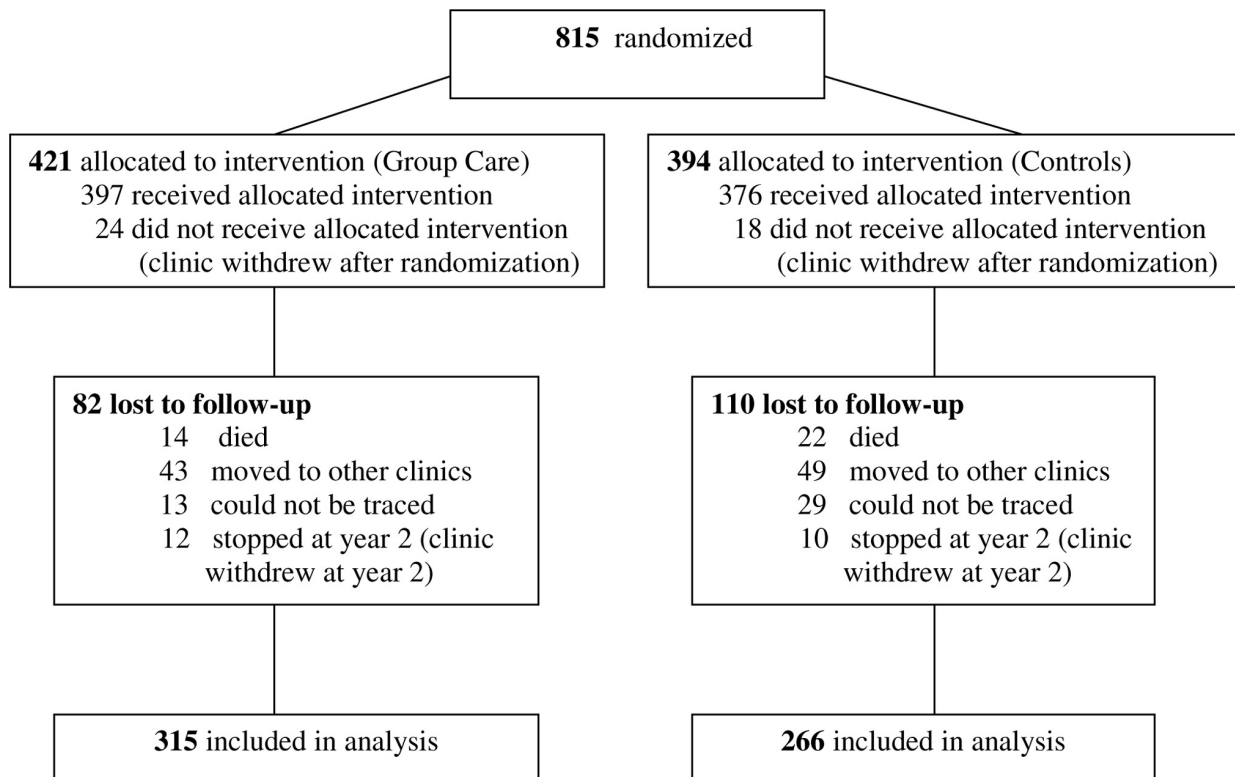

Supplement: dc09-2024_online_appendix.pdf [file dc09-2024_online_appendix.pdf]
